# Supplementary material for: Development of Non-Targeted Mass Spectrometry Method for Distinguishing Spelt and Wheat
Source: MDPI journal article supplement (doi:10.3390/foods12010141), 2022-12-27
Supplement: s1 [file s1]

---

# Development of Non-Targeted Mass Spectrometry Method for Distinguishing Spelt and Wheat

Kapil Nichani <sup>1,2</sup>, Steffen Uhlig <sup>3</sup>, Bertrand Colson <sup>1</sup>, Karina Hettwer <sup>1</sup>, Kirsten Simon <sup>1</sup>, Josephine Bönick <sup>4</sup>, Carsten Uhlig <sup>5</sup>, Sabine Kemmlein <sup>6</sup>, Manfred Stoyke <sup>6,†</sup>, Petra Gowik <sup>6</sup>, Gerd Huschek <sup>7</sup> and Harshadrai M. Rawel <sup>2,\*</sup>

<sup>1</sup> QuoData GmbH, Prellerstr. 14, D-01309 Dresden, Germany

<sup>2</sup> Institute of Nutritional Science, University of Potsdam, Arthur-Scheunert-Allee 114-116, D-14558 Nuthetal, Germany

<sup>3</sup> QuoData GmbH, Fabekstr. 43, D-14195 Berlin, Germany

<sup>4</sup> Bundesinstitut für Risikobewertung, Max-Dohrn-Str. 8-10, D-10589 Berlin, Germany

<sup>5</sup> Akees GmbH, Ansbacher Str. 11, D-10787 Berlin, Germany

<sup>6</sup> Bundesamt für Verbraucherschutz und Lebensmittelsicherheit, Diedersdorfer Weg. 1, D-12277 Berlin, Germany

<sup>7</sup> IGV-Institut für Getreideverarbeitung GmbH, Arthur-Scheunert-Allee 40/41, D-14558 Nuthetal, Germany

\* Correspondence: rawel@uni-potsdam.de

† Currently independent researcher.

## 1. Supplementary Materials and Methods

### 1.1 List of spelt and wheat varieties

**Table S1:** List of spelt and wheat varieties used in the study

| Spelt cultivars in the calibration set               |
|------------------------------------------------------|
| Badekrone                                            |
| Badensonne                                           |
| Begrenzer Roter Spelz                                |
| Frankenkorn                                          |
| Hohenloher                                           |
| Holstenkorn                                          |
| Lignee 24                                            |
| Oberkulmer Rotkorn                                   |
| Rottweiler Frühkorn                                  |
| Schwabenspelz                                        |
| Steiners Roter Tiroler                               |
| Wheat cultivars in the calibration set               |
| Bernstein                                            |
| Brilliant                                            |
| Franz                                                |
| JB Asano                                             |
| Julius                                               |
| Kerubino                                             |
| Lear                                                 |
| Nordkap                                              |
| Pionier                                              |
| Produzent                                            |
| RGT Reform                                           |
| Untypical spelt cultivars in external validation set |
| Ardenne                                              |

---

---

Blauer Samtiger  
Chinese Spring  
Elsenegger Weisskorn  
Meister  
Waggershauser Hohenheimer Weisses Kolben  
Zeiners Weisses Schlegeldinkel  
Emiliano  
Schwabenkorn  
Voegelers Dinkel Weiss  
Weisses Winter-Grannendinkel (Hohenheim)

---

**Old wheat cultivars in external validation set**

---

Criewener Nr 104  
Ostpreussischer Eppweizen EPr  
Roter Saechsischer Landweizen  
Suckerts Sanddickkopf  
Ackermanns Bayernkoenig  
P.S.G. Sandweizen

---

## 2. Supplementary results

### 2.1 Internal validation: calibration set

The output of the convolutional neural networks (CNN) models are probability scores ( $p_i$ ) which are transformed to log odds ( $\ln(\frac{p_i}{1-p_i})$ ). The D scores are calculated using these log odds values. Both are listed below in Table S2 for the cultivars of the calibration set. An example calculation for the D score is described in the following.

The mean log odds are calculated for both the classes to be -7.66 and 7.303. The  $\lambda$  and  $\theta$  values are then calculated according to Equations (S3) and (S4). The obtained  $\lambda$  and  $\theta$  values are then used for the D score calculations for internal validation and external validation set.

$$\bar{\mu}_{spelt} = -7.660 \quad (S1)$$

$$\bar{\mu}_{wheat} = 7.303 \quad (S2)$$

$$\lambda = \frac{2}{\bar{\mu}_{spelt} - \bar{\mu}_{wheat}} = \frac{2}{-7.660 - 7.303} = -0.1336 \quad (S3)$$

$$\theta = 1 - \lambda \times \bar{\mu}_{spelt} = 1 - (-0.1336 \times -7.660) = -0.0238 \quad (S4)$$

For instance, the D score for measurement 1 of Badekrone spelt with log odds of -6.980 can be calculated as follows to give 0.909.

$$D_{Badekrone,M1} = (-6.980 \times -0.1336) - 0.0238 = 0.909 \quad (S5)$$

This way the D scores for all measurements are obtained.

**Table S2A:** Log odds and D scores for spelt cultivars in the calibration set.

| Spelt cultivars in the calibration set | Log odds      |               | D score       |               |
|----------------------------------------|---------------|---------------|---------------|---------------|
|                                        | Measurement 1 | Measurement 2 | Measurement 1 | Measurement 2 |
| Badekrone                              | -6.980        | -6.870        | 0.909         | 0.894         |
| Badensonne                             | -4.758        | -6.384        | 0.612         | 0.829         |
| Begrenzer Roter Spelz                  | -8.958        | -10.079       | 1.173         | 1.323         |
| Frankenkorn                            | -7.178        | -7.867        | 0.936         | 1.028         |
| Hohenloher                             | -7.187        | -7.715        | 0.937         | 1.007         |
| Holstenkorn                            | -8.682        | -8.476        | 1.137         | 1.109         |
| Lignee 24                              | -7.403        | -7.260        | 0.966         | 0.946         |
| Oberkulmer Rotkorn                     | -8.877        | -7.619        | 1.163         | 0.994         |
| Rottweiler Fröhkorn                    | -8.898        | -7.029        | 1.165         | 0.916         |
| Schwabenspelz                          | -8.409        | -6.739        | 1.100         | 0.877         |
| Steiners Roter Tiroler                 | -8.127        | -7.029        | 1.062         | 0.916         |
| Measurement mean value                 | -7.769        | -7.551        | 1.015         | 0.985         |
| Class mean value                       | -7.660        |               | 1             |               |

**Table S2B:** Log odds and D scores for wheat cultivars in the calibration set

| Wheat cultivars in the calibration set | Log odds      |               | D score       |               |
|----------------------------------------|---------------|---------------|---------------|---------------|
|                                        | Measurement 1 | Measurement 2 | Measurement 1 | Measurement 2 |
| Bernstein                              | 7.229         | 7.745         | −0.990        | −1.059        |
| Brillant                               | 5.844         | 6.289         | −0.805        | −0.864        |
| Franz                                  | 8.409         | 8.702         | −1.148        | −1.187        |
| JB Asano                               | 6.451         | 5.683         | −0.886        | −0.783        |
| Julius                                 | 7.422         | 7.846         | −1.016        | −1.073        |
| Kerubino                               | 7.118         | 6.990         | −0.975        | −0.958        |
| Lear                                   | 6.970         | 6.999         | −0.955        | −0.959        |
| Nordkap                                | 7.757         | 10.229        | −1.061        | −1.391        |
| Pionier                                | 7.044         | 6.852         | −0.965        | −0.940        |
| Produzent                              | 5.149         | 7.579         | −0.712        | −1.037        |
| RGT Reform                             | 8.101         | 8.264         | −1.107        | −1.128        |
| Measurement mean value                 | 7.045         | 7.562         | −0.965        | −1.035        |
| Class mean value                       | 7.303         |               | −1            |               |

## 2.2 Precision parameters

**Table S3:** Summary of precision parameters for spelt and wheat

|                          | Spelt | Wheat |
|--------------------------|-------|-------|
| Class mean D score value | 1     | −1    |
| Intermediate SD          | 0.075 | 0.074 |
| Classification SD        | 0.393 | 0.391 |

## 2.2 External validation: processed goods and artificial mixes

Table S4 shows the average log odds and D scores obtained from predictions of the eleven NCV models, for the duplicate measurements of processed goods and artificial mix. The mean D score for artificial mixes is around 0.9.

**Table S4:** Log odds and D scores for processed goods and artificial mixes

| Processed goods and artificial mixes |                | Log odds      |               | D score       |               |
|--------------------------------------|----------------|---------------|---------------|---------------|---------------|
|                                      |                | Measurement 1 | Measurement 2 | Measurement 1 | Measurement 2 |
| <b>Processed goods</b>               |                |               |               |               |               |
| Spelt flour mix                      |                | -6.133        | -6.128        | 0.796         | 0.795         |
| Spelt bread                          |                | -6.087        | -5.830        | 0.790         | 0.755         |
| Measurement mean value               |                | -6.110        | -5.979        | 0.793         | 0.775         |
| Processed goods mean                 |                | -6.045        |               | 0.784         |               |
| <b>Artificial mixes</b>              |                |               |               |               |               |
| 90% Oberkulmer Rotkorn +             | 10% Bernstein  | -7.437        | -6.701        | 0.970         | 0.872         |
|                                      | 10% Brillant   | -7.059        | -6.298        | 0.920         | 0.818         |
|                                      | 10% Franz      | -7.011        | -6.201        | 0.913         | 0.805         |
|                                      | 10% JB Asano   | -7.120        | -6.589        | 0.928         | 0.857         |
|                                      | 10% Julius     | -7.149        | -6.595        | 0.932         | 0.858         |
|                                      | 10% Kerubino   | -7.238        | -6.619        | 0.944         | 0.861         |
|                                      | 10% Lear       | -7.734        | -6.991        | 1.010         | 0.911         |
|                                      | 10% Nordkap    | -7.349        | -6.372        | 0.958         | 0.828         |
|                                      | 10% Pionier    | -7.199        | -6.530        | 0.938         | 0.849         |
|                                      | 10% Produzent  | -7.688        | -6.817        | 1.004         | 0.887         |
|                                      | 10% RGT Reform | -7.043        | -6.283        | 0.917         | 0.816         |
| Measurement mean value               |                | -7.275        | -6.545        | 0.949         | 0.851         |
| Artificial mix mean value            |                | -6.910        |               | 0.9           |               |

### 2.3 External validation: untypical spelt

Table S5 shows the average log odds and D scores obtained from predictions of the eleven NCV models, for the duplicate measurements of untypical spelt cultivars. The mean D score is 0.572.

**Table S5:** Log odds and D scores for untypical spelt cultivars

| Untypical spelt cultivars                 | Log odds      |               | D score       |               |
|-------------------------------------------|---------------|---------------|---------------|---------------|
|                                           | Measurement 1 | Measurement 2 | Measurement 1 | Measurement 2 |
| Ardenne                                   | -1.726        | -4.539        | 0.207         | 0.583         |
| Blauer Samtiger                           | -3.114        | -5.365        | 0.392         | 0.693         |
| Chinese Spring                            | -2.919        | -4.730        | 0.366         | 0.608         |
| Elsenegger Weisskorn                      | -4.758        | -4.596        | 0.612         | 0.590         |
| Emiliano                                  | -4.744        | -4.142        | 0.610         | 0.530         |
| Meister                                   | -4.182        | -4.604        | 0.535         | 0.592         |
| Schwabenkorn                              | -5.012        | -3.731        | 0.646         | 0.475         |
| Voegelers Dinkelweiss                     | -5.325        | -4.628        | 0.688         | 0.595         |
| Waggershauser Hohenheimer Weisser Kolben  | -5.919        | -4.018        | 0.767         | 0.513         |
| Weißer Winter-Grannendinkel aus Hohenheim | -5.341        | -4.689        | 0.690         | 0.603         |
| Zeiners weisser Schlegeldinkel            | -5.240        | -4.810        | 0.676         | 0.619         |
| Measurement mean value                    | -4.389        | -4.532        | 0.563         | 0.582         |
| Untypical spelt mean                      | -4.460        |               | 0.572         |               |

#### 2.4 External validation: old wheat

Table S6 shows the average log odds and D scores obtained from predictions of the eleven NCV models, for the duplicate measurements of old wheat cultivars. The mean D score for Ackermanns Bayernkönig is 0.11. And the mean D score for the duplicate measurements of Criewener Nr. 104, Ostpreußischer Eppweizen, P.S.G. Sandweizen, Roter Sächsischer Landweizen and Suckers Sanddickkopf is -0.1.

**Table S6:** Log odds and D scores for old wheat cultivars

| Old wheat cultivars          | Log odds      |               | D score       |               |
|------------------------------|---------------|---------------|---------------|---------------|
|                              | Measurement 1 | Measurement 2 | Measurement 1 | Measurement 2 |
| Ackermanns Bayernkönig       | -1.198        | -0.824        | 0.136         | 0.086         |
| Criewener Nr. 104            | 0.111         | 0.332         | -0.039        | -0.068        |
| Ostpreußischer Eppweizen     | 0.521         | 0.424         | -0.094        | -0.081        |
| P.S.G. Sandweizen            | 0.678         | 0.592         | -0.114        | -0.103        |
| Roter Sächsischer Landweizen | 0.558         | 1.735         | -0.098        | -0.256        |
| Suckers Sanddickkopf         | 0.704         | 0.240         | -0.118        | -0.056        |
| Measurement mean value       | 0.229         | 0.417         | -0.054        | -0.080        |
| Old wheat mean value         | 0.323         |               | -0.067        |               |
